# Supplementary material for: Significant contribution of inland ships to the total NO x emissions along the Yangtze River
Source: Copernicus journal article supplement (doi:10.5194/acp-23-5587-2023), 2023-05-17
Supplement: Supplementary file 1 [file acp-23-5587-2023-supplement.pdf]

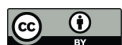

*Supplement of*

## **Significant contribution of inland ships to the total $\text{NO}_x$ emissions along the Yangtze River**

**Xiumei Zhang et al.**

*Correspondence to:* Yan Yin ([yinyan@nuist.edu.cn](mailto:yinyan@nuist.edu.cn)) and Xiumei Zhang ([xiumeizhang2019@outlook.com](mailto:xiumeizhang2019@outlook.com))

The copyright of individual parts of the supplement might differ from the article licence.

## Supplement

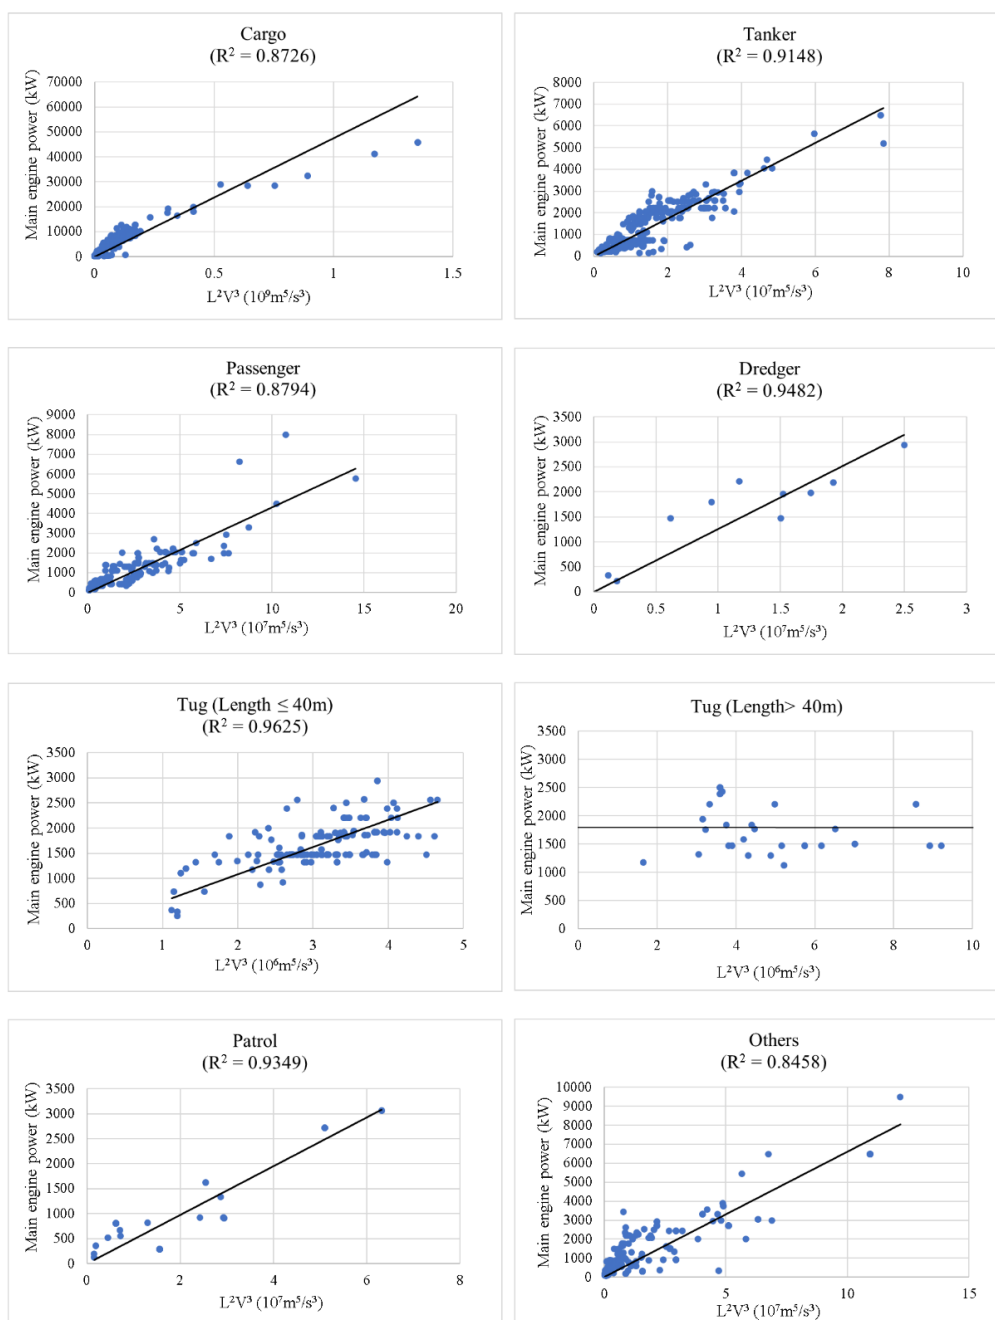

**Figure S1. Fitted linear relationship between main engine power and the square of the vessel's length multiplied by the cube of the real-time speed (y-axis gives the main engine power, x-axis shows  $L^2 \times v_{MAX}^3$ ).**

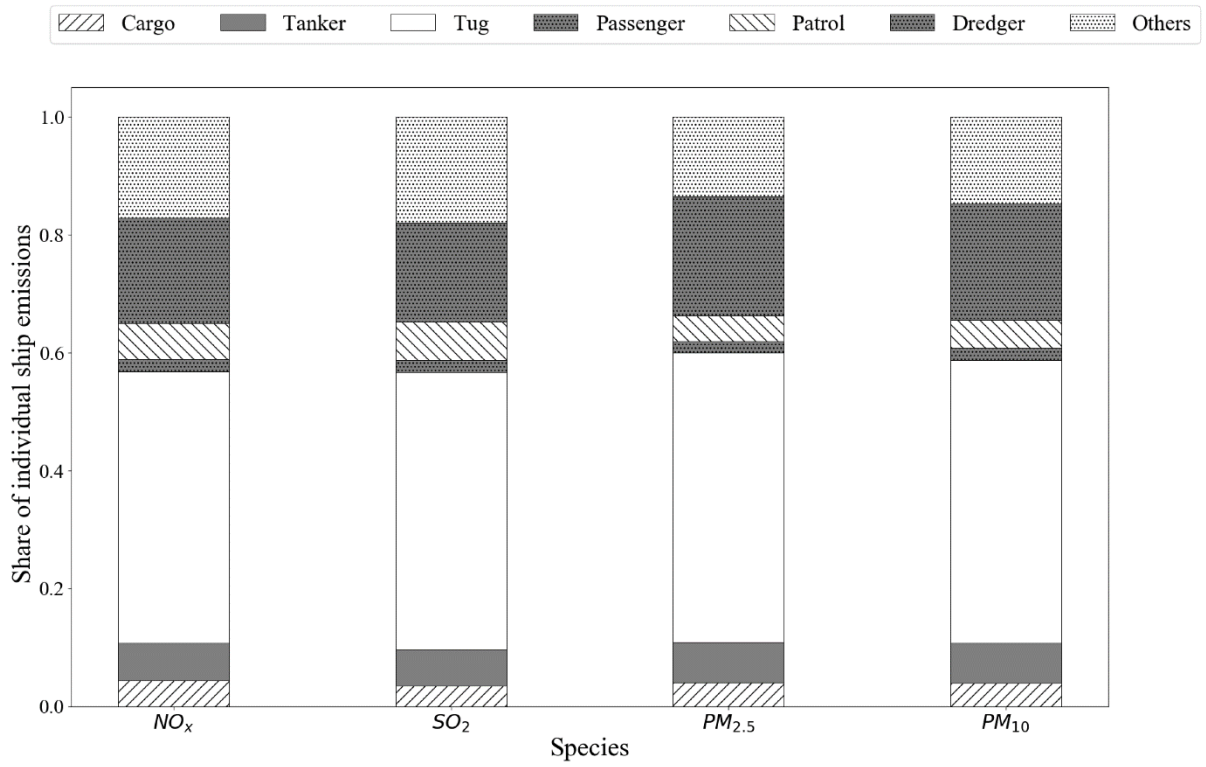

5

Figure S2. Share of ship emissions from different ship types for four pollutant species

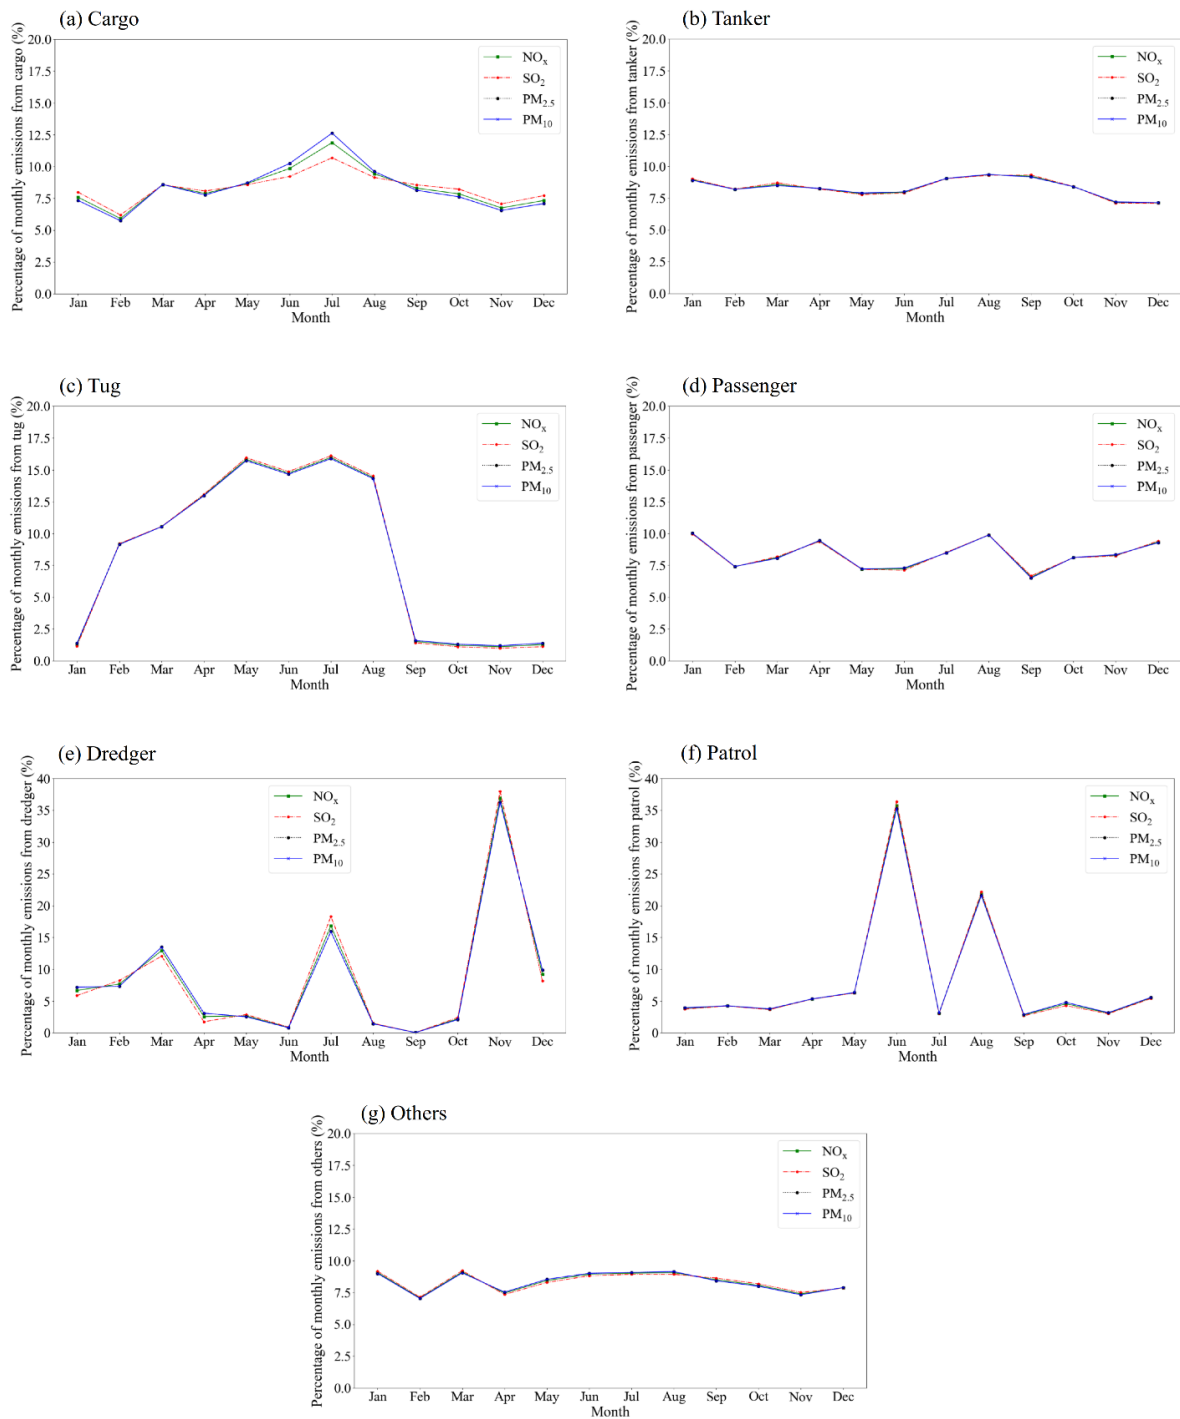

**Figure S3. Monthly changes in the emissions from different types of ships**

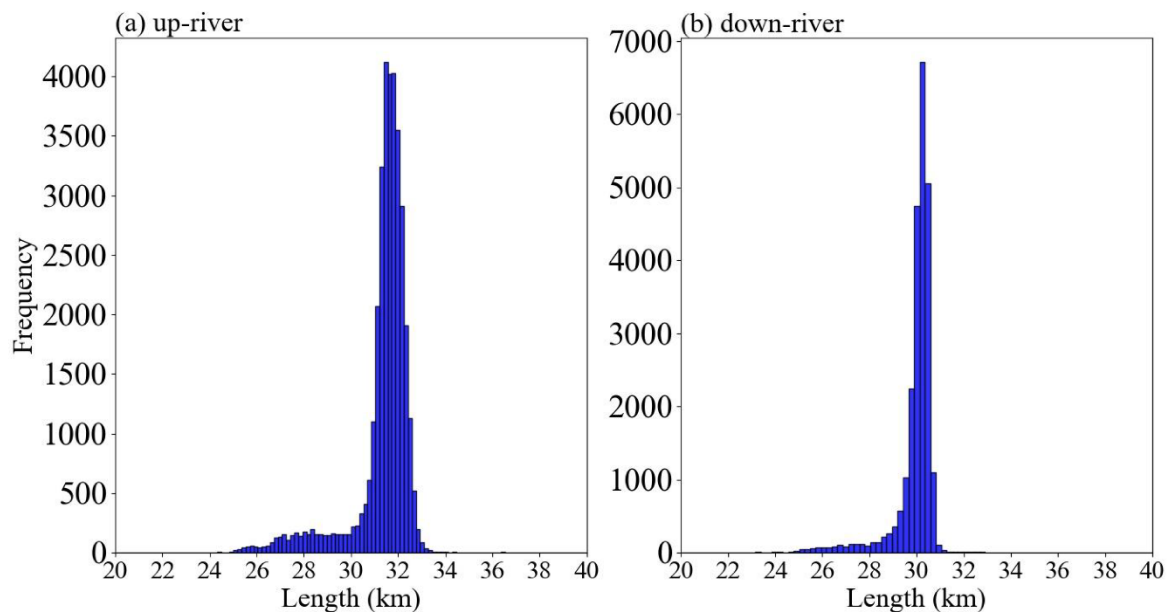

10 **Figure S4. Vessel sailing distance frequency charts derived from AIS for downstream and upstream directions**

**Table S1. Low load adjustment multipliers ( $f_{LLAM}$ ) for main engine emission factors**

| Load | NO <sub>x</sub> | SO <sub>2</sub> | PM <sub>2.5</sub> | PM <sub>10</sub> |
|------|-----------------|-----------------|-------------------|------------------|
| 0.01 | 11.47           | 1               | 19.17             | 19.17            |
| 0.02 | 4.63            | 1               | 7.29              | 7.29             |
| 0.03 | 2.92            | 1               | 4.33              | 4.33             |
| 0.04 | 2.21            | 1               | 3.09              | 3.09             |
| 0.05 | 1.83            | 1               | 2.44              | 2.44             |
| 0.06 | 1.6             | 1               | 2.04              | 2.04             |
| 0.07 | 1.45            | 1               | 1.79              | 1.79             |
| 0.08 | 1.35            | 1               | 1.61              | 1.61             |
| 0.09 | 1.27            | 1               | 1.48              | 1.48             |
| 0.10 | 1.22            | 1               | 1.38              | 1.38             |

|      |      |   |      |      |
|------|------|---|------|------|
| 0.11 | 1.17 | 1 | 1.3  | 1.3  |
| 0.12 | 1.14 | 1 | 1.24 | 1.24 |
| 0.13 | 1.11 | 1 | 1.19 | 1.19 |
| 0.14 | 1.08 | 1 | 1.15 | 1.15 |
| 0.15 | 1.06 | 1 | 1.11 | 1.11 |
| 0.16 | 1.05 | 1 | 1.08 | 1.08 |
| 0.17 | 1.03 | 1 | 1.06 | 1.06 |
| 0.18 | 1.02 | 1 | 1.04 | 1.04 |
| 0.19 | 1.01 | 1 | 1.02 | 1.02 |
| 0.20 | 1    | 1 | 1    | 1    |

**Table S2. Evolution of fuel sulfur content requirements in inland rivers.**

| Fuel type          | Year    |           |         |         |      |
|--------------------|---------|-----------|---------|---------|------|
|                    | 2016    | 2017      | 2018    | 2019    | 2020 |
| <b>general</b>     |         |           |         |         |      |
| <b>diesel oil</b>  | ≤0.035% | ≤0.035%   | ≤0.005% | ≤0.001% |      |
| <b>(GDO)</b>       |         |           |         |         |      |
| <b>Marine fuel</b> |         |           |         |         |      |
| residual oil       |         | 0.1%-3.5% |         |         |      |
| (RO)               |         |           |         |         |      |
| marine             |         |           |         | ≤0.001% |      |
| <b>oil (MFO)</b>   |         |           |         |         |      |
| distillates        |         | 0.1-1.5%  |         |         |      |
| (MD)               |         |           |         |         |      |

**Table S3. Ship traffic volume in each month from September 2018 to August 2019 (Unit: Ships)**

| Types        | Jan          | Feb          | Mar          | Apr          | May          | Jun          | Jul          | Aug          | Sep          | Oct          | Nov          | Dec          |
|--------------|--------------|--------------|--------------|--------------|--------------|--------------|--------------|--------------|--------------|--------------|--------------|--------------|
| Cargo        | 48834        | 35154        | 51960        | 50698        | 53759        | 47567        | 48372        | 46242        | 46524        | 47137        | 44777        | 49989        |
| Tanker       | 8577         | 7091         | 8082         | 8299         | 7925         | 7809         | 8419         | 8237         | 7855         | 7995         | 8211         | 8388         |
| Passenger    | 706          | 695          | 718          | 708          | 672          | 635          | 603          | 540          | 744          | 623          | 650          | 677          |
| Tug          | 1007         | 943          | 1137         | 1012         | 1049         | 1075         | 1018         | 984          | 938          | 988          | 946          | 1031         |
| Dredger      | 71           | 5            | 58           | 75           | 23           | 5            | 12           | 5            | 1            | 7            | 39           | 45           |
| Patrol       | 541          | 479          | 478          | 457          | 478          | 423          | 429          | 417          | 450          | 506          | 472          | 522          |
| Other        | 933          | 655          | 1008         | 981          | 1006         | 882          | 909          | 906          | 848          | 897          | 877          | 1030         |
| <b>Total</b> | <b>60669</b> | <b>45022</b> | <b>63441</b> | <b>62230</b> | <b>64912</b> | <b>58396</b> | <b>59762</b> | <b>57331</b> | <b>57360</b> | <b>58153</b> | <b>55972</b> | <b>61682</b> |

**Table S4. Non-ship emissions given by MEIC and estimated ship emissions in the Jiangsu section of the Yangtze River (kton yr<sup>-1</sup>)**

| Sectors                         | SO <sub>2</sub> | NO <sub>x</sub> | PM <sub>10</sub> | PM <sub>2.5</sub> |
|---------------------------------|-----------------|-----------------|------------------|-------------------|
| Power                           | 46.6            | 318.6           | 65.6             | 39.7              |
| Industry                        | 235.3           | 649.4           | 268.2            | 174.6             |
| Residential                     | 8.8             | 24.4            | 115.7            | 111.2             |
| Transportation                  | 24.6            | 545.9           | 42.4             | 41.3              |
| <b>Total non-ship emissions</b> | <b>315.3</b>    | <b>1538.3</b>   | <b>491.9</b>     | <b>366.8</b>      |
| <b>Ship emissions</b>           | <b>0.04</b>     | <b>83.5</b>     | <b>0.006</b>     | <b>0.005</b>      |
